# Supplementary material for: Schwann cells regulate tumor cells and cancer-associated fibroblasts in the pancreatic ductal adenocarcinoma microenvironment
Source: PubMed Central journal article supplement (PMC10390497; doi:10.1038/s41467-023-40314-w), 2023-07-31
Supplement: 41467_2023_40314_MOESM2_ESM.pdf [file 41467_2023_40314_MOESM2_ESM.pdf]

## **Description of Additional Supplementary Files**

File Name: Supplementary Data 1

Description: Marker genes in scRNA-seq

File Name: Supplementary Data 2

Description: Marker genes in spatial transcriptomics data

File Name: Supplementary Data 3

Description: Proteins in Schwann cell CM via mass spectrometry (MS)
